# Supplementary material for: “I Had to Rediscover Our Healthy Food”: An Indigenous Perspective on Coping with Type 2 Diabetes Mellitus
Source: MDPI journal article supplement (doi:10.3390/ijerph19010159), 2021-12-24
Supplement: s1 [file s1]

### **Interview guide**

| Topic                             | Questions                                                                                                                                                                                                                                                                                                                                                                                                                                                                                                                                                                                                  |
|-----------------------------------|------------------------------------------------------------------------------------------------------------------------------------------------------------------------------------------------------------------------------------------------------------------------------------------------------------------------------------------------------------------------------------------------------------------------------------------------------------------------------------------------------------------------------------------------------------------------------------------------------------|
| Opening Question                  | Can you tell me your story of diabetes?                                                                                                                                                                                                                                                                                                                                                                                                                                                                                                                                                                    |
| Diagnosis                         | How long do you cope with diabetes?<br><br>What was the process of your diagnosis like?                                                                                                                                                                                                                                                                                                                                                                                                                                                                                                                    |
| The cause of T2DM                 | In your opinion what is the cause of your diabetes?                                                                                                                                                                                                                                                                                                                                                                                                                                                                                                                                                        |
| Medications and lifestyle changes | What was the process of deciding on treatment for the diabetes?<br><br>What was your role in the decision process?<br><br>Which parts of treatment are more or less difficult for you to perform?<br><br>Do you take medications for diabetes?<br><br>If so, when and how do you take medications?<br><br>Which lifestyle habits have you changed and why?<br><br>Was there a time that you decided to stop taking medications?<br><br>How do the medications affect you?<br><br>Are there any unpleasant side effects to the medications you take?<br><br>If so, how do you cope with these side effects? |
| Traditional medicine              | Did you consult with a traditional healer? (if so, who)<br><br>Do you take traditional/herbal medications?<br><br>If you take herbal medications together with Western medications, which helps you better?                                                                                                                                                                                                                                                                                                                                                                                                |

|                                            |                                                                                                                                                                                                                                                                                                                                                                                                                                                                                             |
|--------------------------------------------|---------------------------------------------------------------------------------------------------------------------------------------------------------------------------------------------------------------------------------------------------------------------------------------------------------------------------------------------------------------------------------------------------------------------------------------------------------------------------------------------|
| Gender and coping with diabetes            | <p>How has diabetes influenced the work you have to do inside or outside the house?</p> <p>How your role at home influences your coping with diabetes?</p> <p>How has diabetes influenced your relationship with your children?</p> <p>How has diabetes influenced your relationship with relatives who live with you?</p> <p>How has diabetes or coping with diabetes influenced your relationship with you spouse?</p> <p>How do friends or relatives help you to cope with diabetes?</p> |
| Treatment accessibility                    | <p>Is traditional Bedouin cuisine suitable for coping with diabetes?</p> <p>Are medications and medical treatment accessible in your area of living?</p> <p>Which health advice or lifestyle changes recommended for you by health professionals are possible for you to make/feasible for you?</p> <p>Which lifestyle changes you would have wanted to make and still haven't or feel that you are unable to make?</p> <p>If and if so when do you practice physical activity?</p>         |
| Interactions with healthcare professionals | <p>How would you describe your relationships with your healthcare professionals?</p> <p>Give one example to an especially good experience you had with an healthcare professional and one especially bad one you had</p> <p>Do you prefer to receive medical treatment from a health professional of your own gender?</p>                                                                                                                                                                   |
| Faith and religion                         | <p>How does religious faith helps you to cope with diabetes (if at all)?</p>                                                                                                                                                                                                                                                                                                                                                                                                                |

|                                              |                                                                                                                                                                                                                                                                                                                                                                                                                                                                                                                                                                                                                            |
|----------------------------------------------|----------------------------------------------------------------------------------------------------------------------------------------------------------------------------------------------------------------------------------------------------------------------------------------------------------------------------------------------------------------------------------------------------------------------------------------------------------------------------------------------------------------------------------------------------------------------------------------------------------------------------|
| Social rights                                | <p>How did you learn what are the social rights you are entitled to?</p> <p>Which social rights did you utilize? (for example, sick leave)</p> <p>Do you feel that there are social rights which might have helped you but you're not entitled to?</p>                                                                                                                                                                                                                                                                                                                                                                     |
| Social perceptions and stigma regarding T2DM | <p>To which people in your life you told about diabetes? When?</p> <p>Have you ever felt uncomfortable telling others about diabetes?</p> <p>When you visit friends/relatives do you tell them that you have diabetes so they will serve you suitable foods and drinks (sugarless)?</p> <p>How do you feel regarding diabetes and your coping with it?</p> <p>How have your perceptions of diabetes changed over time?</p> <p>How have the perceptions of you friends and relatives regarding diabetes changed over time?</p> <p>Do you encounter misconceptions or prejudices about diabetes among friends or family?</p> |
| Information                                  | <p>What information you had about T2DM before you were diagnosed?</p> <p>Did you search the internet for information?</p> <p>If we could arrange for you to meet the number one specialist for T2DM, what would you have wanted to tell or ask him/her?</p>                                                                                                                                                                                                                                                                                                                                                                |
| Changes over time                            | <p>Do you experience changes over time regarding coping with diabetes?</p> <p>How do you see the future in relation to coping with diabetes?</p> <p>How do you see the future in relation to your health?</p>                                                                                                                                                                                                                                                                                                                                                                                                              |

|                   |                                                                                                                                                                                                                                                                                                                  |
|-------------------|------------------------------------------------------------------------------------------------------------------------------------------------------------------------------------------------------------------------------------------------------------------------------------------------------------------|
| Message to others | <p>How in our opinion can coping with T2DM be improved, both in general and specifically among the Bedouin community?</p> <p>What message would you like to give others who cope with T2DM?</p> <p>What message would you like to give physicians and healthcare professionals who treat patients with T2DM?</p> |
| Final questions   | Is there anything I didn't ask and you would like to tell me?                                                                                                                                                                                                                                                    |
| Demographics      | <p>age</p> <p>gender</p> <p>Place of living</p> <p>religion</p> <p>Persona status</p> <p>Number of people living in the house</p> <p>Occupation</p>                                                                                                                                                              |
